# Supplementary material for: Transdermal delivery of dextran using conductive microneedles assisted by iontophoresis
Source: Royal Society of Chemistry journal article supplement (doi:10.1039/d2tb01049f), 2022-01-01
Supplement: d2tb01049f1.pdf [file d2tb01049f1.pdf]

Supporting information for

## Transdermal delivery of dextran using conductive microneedles assisted by iontophoresis

Tianli Hu<sup>a</sup>, Zhibiao Zhang<sup>a</sup>, Chenjie Xu<sup>a, \*</sup>

<sup>a</sup>Department of Biomedical Engineering, City University of Hong Kong, Tat Chee Avenue, Kowloon, Hong Kong SAR, China

\* Correspondence to: [chenjie.xu@cityu.edu.hk](mailto:chenjie.xu@cityu.edu.hk)

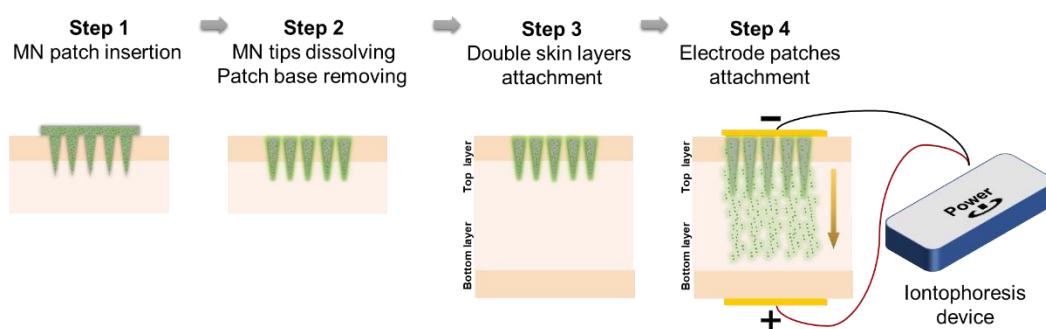

**Figure S1.** Scheme of the transdermal delivery of macromolecules by HAP MNs and ITP in the skin model.
